# Supplementary material
Source: publisher figshare collection journal article supplement (https://frontiersin.figshare.com/ndownloader/files/30972742)
Supplement: Supplementary file [file 30972742]

# Supplementary Material for "CGAT: Cell Graph ATtention Network for Grading of Pancreatic Disease Histology Images"

**Mayank Baranwal**<sup>1,2\*</sup>, **Santhoshi Krishnan**<sup>3,4</sup>, **Morgan Oneka**<sup>4</sup>, **Timothy Frankel**<sup>5</sup> and **Arvind Rao**<sup>3,4,6,7,8,\*</sup>

<sup>1</sup> *Division of Data & Decision Sciences, Tata Consultancy Services Research, Mumbai, Maharashtra, 400607, India*

<sup>2</sup> *Department of Systems and Control Engineering, Indian Institute of Technology, Bombay, Maharashtra, 400076, India*

<sup>3</sup> *Department of Electrical & Computer Engineering, Rice University, Houston, TX, USA*

<sup>4</sup> *Department of Computational Medicine and Bioinformatics, University of Michigan, Ann Arbor, MI, USA*

<sup>5</sup> *Department of Surgery, University of Michigan, Ann Arbor, MI, USA*

<sup>6</sup> *Department of Biostatistics, University of Michigan, Ann Arbor, MI, USA*

<sup>7</sup> *Department of Radiation Oncology, University of Michigan, Ann Arbor, MI, USA*

<sup>8</sup> *Department of Biomedical Engineering, University of Michigan, Ann Arbor, MI, USA*

Correspondence\*:

Dr. Mayank Baranwal  
baranwal.mayank@tcs.com

Dr. Arvind Rao  
ukarvind@umich.edu

## 1 THE MORISITA-HORN DISSIMILARITY INDEX

The Morisita-horn similarity index is a measure derived from, and used the field of ecology, where it was used to study predator-prey relationships among species in a given environment. This measure has been adapted for use in quantifying the co-localization of any two pairs of cell phenotypes in the tumor micro-environment, and among other cancer types, has been shown to be predictive of breast cancer [(1, 2)]. The value of the indices range from 0 to 1, with 0 indicating no overlap (or co-localization from the perspective of its application) between the two phenotypes of cells, and 1 indicating perfect overlap of cells of both phenotypes in each of the observed "tessellations" in a given image. Formally, the index is mathematically defined as,

$$MH_{(c_1, c_2)} = \frac{2 \sum_k \frac{c_{k1}}{\sum c_{i1}} \frac{c_{k2}}{\sum c_{i2}}}{\sum_k \left( \frac{c_{k1}}{\sum c_{i1}} \right)^2 + \sum_k \left( \frac{c_{k2}}{\sum c_{i2}} \right)^2} \quad (1)$$

where,  $c_1$  and  $c_2$  are the two cell phenotype populations of interest, and  $k$  being the number of unique species/phenotypes present. In the context of our paper, we set the quadrant to be a 250 x 250 microns square, for computing the index value, as was proposed in the original paper [(1)] The index computations and associated analyses were implemented in R (R Core Team (2013)).

## 2 SUPPLEMENTARY TABLES AND FIGURES

### 2.1 Figures

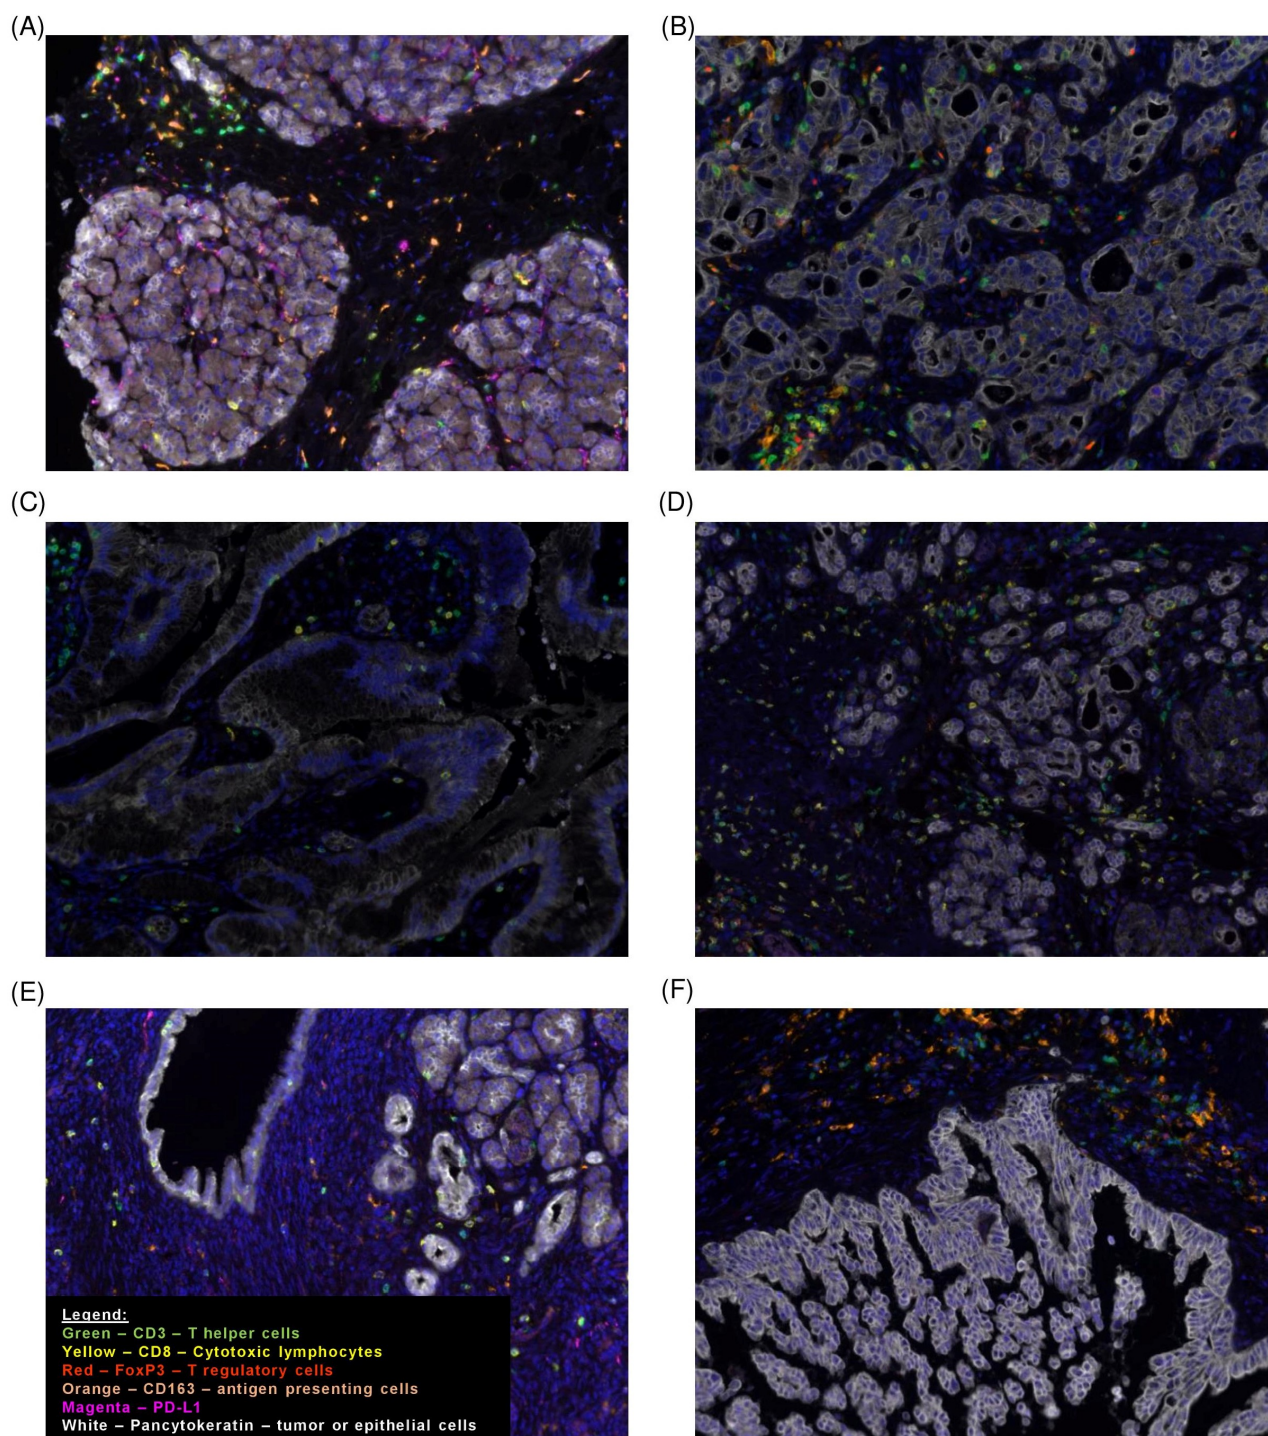

**Figure 1.** A representative subset of multiplexed immunofluorescence (mIF) image from our study cohort, with (A)-(F) representing sample images from Chronic Pancreatitis, PDAC, IPMN, PanIN, MCN, and IPMN-associated PDAC, respectively. Image courtesy Dr. Timothy L. Frankel, University of Michigan Department of Surgery.

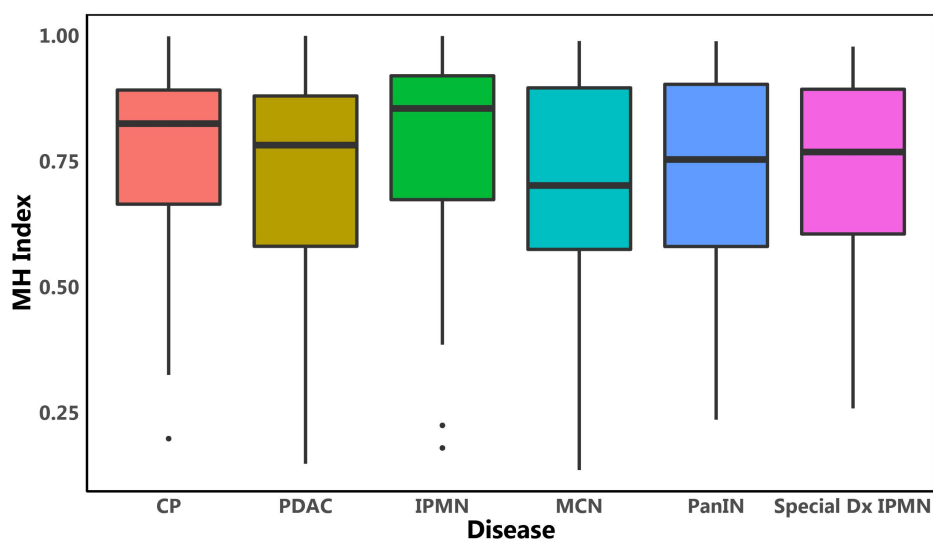

**Figure 2.** Box-plots depicting the spread of the Morisita-Horn Index across all 6 pancreatic disease groups. As it can be seen, there is a considerable overlap in the range of values from each group, thus strengthening the claim that the Morisita-Horn index does not effectively capture the difference in cellular arrangement, especially in a limited data cohort such as the one used in our study.

## 2.2 Tables

| Groups | Scores    | IPMN      | MCN       | PanIN     | PDAC      | IPMN-associated PDAC |
|--------|-----------|-----------|-----------|-----------|-----------|----------------------|
| CP     | AUC       | 0.57±0.01 | 0.70±0.03 | 0.56±0.06 | 0.77±0.00 | 0.63±0.01            |
|        | Precision | 0.68±0.27 | 0.75±0.00 | 0.61±0.02 | 1.00±0.00 | 0.64±0.03            |
|        | Recall    | 0.30±0.27 | 1.00±0.00 | 1.00±0.00 | 0.00±0.00 | 0.93±0.10            |
| IPMN   | AUC       |           | 0.87±0.07 | 0.56±0.00 | 0.64±0.00 | 0.63±0.05            |
|        | Precision |           | 0.61±0.04 | 0.69±0.00 | 1.00±0.00 | 0.69±0.00            |
|        | Recall    |           | 0.78±0.00 | 0.96±0.09 | 0.00±0.00 | 1.00±0.00            |
| MCN    | AUC       |           |           | 0.70±0.02 | 0.50±0.09 | 0.53±0.05            |
|        | Precision |           |           | 1.00±0.00 | 1.00±0.00 | 1.00±0.00            |
|        | Recall    |           |           | 0.16±0.08 | 0.00±0.00 | 0.20±0.00            |
| PanIN  | AUC       |           |           |           | 0.78±0.01 | 0.73±0.02            |
|        | Precision |           |           |           | 1.00±0.00 | 0.68±0.09            |
|        | Recall    |           |           |           | 0.00±0.00 | 0.82±0.13            |
| PDAC   | AUC       |           |           |           |           | 0.67±0.01            |
|        | Precision |           |           |           |           | 0.79±0.00            |
|        | Recall    |           |           |           |           | 1.00±0.00            |

**Table 1.** Classification metrics for the 15 pairwise CGAT classifiers from every point pattern set from each disease group with just two cell-markers (“Tumor” and “Immune”). The AUC, precision and recall scores on the held-out test set for each pairwise classifier is listed here.

| Cell 1 | Cell 2 | Enrichment score | P-value (Enrichment) | P-value (Depletion) |
|--------|--------|------------------|----------------------|---------------------|
| Treg   | Treg   | -0.911           | 1                    | 0.42                |
| Treg   | Tumor  | -0.046           | 0.987                | 0.014               |
| Treg   | CTL    | 0.281            | 0.008                | 0.992               |
| Tumor  | Tumor  | 0.002            | 0                    | 1                   |
| CTL    | CTL    | 0.078            | 0                    | 1                   |
| CTL    | Tumor  | -0.013           | 1                    | 0                   |

**Table 2.** Results from the Giotto framework for Chronic Pancreatitis.

| Cell 1 | Cell 2 | Enrichment score | P-value (Enrichment) | P-value (Depletion) |
|--------|--------|------------------|----------------------|---------------------|
| Treg   | Treg   | 0.146            | 0                    | 1                   |
| Treg   | Tumor  | -0.032           | 1                    | 0                   |
| Treg   | CTL    | 0.012            | 0.095                | 0.908               |
| Tumor  | Tumor  | 0.008            | 0                    | 1                   |
| CTL    | CTL    | 0.005            | 0.207                | 0.795               |
| CTL    | Tumor  | -0.005           | 0.92                 | 0.08                |

**Table 3.** Results from the Giotto framework for PDAC.

## REFERENCES

- 1 .Maley CC, Koelble K, Natrajan R, Aktipis A, Yuan Y. An ecological measure of immune-cancer colocalization as a prognostic factor for breast cancer. *Breast Cancer Research* **17** (2015). doi:10.1186/s13058-015-0638-4.
- 2 .Wolda H. Similarity indices, sample size and diversity. *Oecologia* **50** (1981) 296–302. doi:10.1007/bf00344966.
